# Supplementary material
Source: HighWire-hosted journal article supplement (https://thorax.bmj.com/highwire/filestream/173900/field_highwire_adjunct_files/3/6410857Table4.docx)
Supplement: 6410857Table4.docx [file 6410857Table4.docx]

Table 4 (Supplement): Sensitivity, specificity, positive and negative predictive value of RR, glycaemia and APACHE 2 index in predicting outcome of NIV

|  | Sensitivity | Specificity | Positive predictive  value | Negative predictive  value |
| --- | --- | --- | --- | --- |
| RR<30/minute  n=65; success=61 (94%) | 82%* | 75%* | 94%* | 48%* |
| APACHE **II** ≤16  n=56; success=51 (91%) | 69%* | 69%* | 91%* | 32%* |
| RBG<7mmol/l  n=44; success=43 (98%) | 60%* | 94%* | 98%* | 34%* |
| APACHE **II** ≤16  RBG<7mmol/l  N=29; success=29 (100%) | 76%* | 100%* | 100%* | 47%* |
| RR<30/minute  APACHE **II** ≤16  N=42; success=41 (98%) | 89%* | 89%* | 98%* | 62%* |
| RR<30/minute  RBG<7mmol/l  *n=39; success=38(97%)* | 79%* | 92%* | 97%* | 55%* |
| RR<30/minute  RBG<7mmol/l  APACHE **II** ≤16  *n=25;success=25(100%)* | 86%* | 100%* | 100%* | 66%* |
| RR≥30/minute  n=25; failure=12(48%) | 75%† | 82%† | 48%† | 94%† |
| APACHE **II** >16  n=34; failure=11 (32%) | 69%† | 69%† | 32%† | 91%† |
| RBG≥7mmol/l  n=44; failure=15 (34%) | 94%† | 60%† | 34%† | 98%† |
| APACHE **II** >16  RBG≥7mmol/l  n=19; failure=10 (53%) | 100%† | 76%† | 53%† | 100%† |
| RR≥30/minute  APACHE **II** >16  n=13; failure=8 (62%) | 89%† | 89%† | 62%† | 98%† |
| RR≥30/minute  RBG≥7mmol/l  *n=22;failure=12(55%)* | 92%† | 79%† | 92%† | 97%† |
| RR≥30/minute  RBG≥7mmol/l  APACHE **II** >16  *n=12; failure=8(67%)* | 100%† | 86%† | 67%† | 100%† |

*denotes success of NIV; †denotes failure of NIV
